# Supplementary material for: Development and Comparison of Two Assay Formats for Parallel Detection of Four Biothreat Pathogens by Using Suspension Microarrays
Source: PubMed Central journal article supplement (PMC3280232; doi:10.1371/journal.pone.0031958), 2012-02-15
Supplement: pone.0031958.s001.pdf [file pone.0031958.s001.pdf]

**Supplemental table S1 - Primers used for the production of amplicons from signature sequences**

| <i>Target</i>  | <i>Oligo name</i> | <i>Sequence 5'-3'</i>           |
|----------------|-------------------|---------------------------------|
| <i>pl3</i>     | <i>pl3trg_f</i>   | ATTTTCAAAAAACCTGTAAGAG          |
|                | <i>pl3trg_r</i>   | GTATCTTGCAATGTAATCATAAGCTCATGT  |
| <i>cya</i>     | <i>cyatrg_f</i>   | CTGAAAGGAGAAAAAGCACTTAAAGCTTC   |
|                | <i>cyatrg_r</i>   | TAGTTGAATCCGGTTTCCTCTCAATTC     |
| <i>capB</i>    | <i>cabtrg_f</i>   | CGCGAATGATATATTGGTTTACTGACG     |
|                | <i>cabtrg_r</i>   | CGGTCAGGGCGGCAA                 |
| <i>ypo0393</i> | <i>ypotrg_f</i>   | AAACACCTTCCCTATAGATCGTACTG      |
|                | <i>ypotrg_r</i>   | AAATCTTCTTCTCAAAACAAAGAAAAACAT  |
| <i>yinH</i>    | <i>yintrg_f</i>   | GCGCTTACGGGATCATTAAATCAGT       |
|                | <i>yintrg_r</i>   | CTGCACGCATTCTTTTTGTTAAAATAGTGG  |
| <i>Pla1</i>    | <i>platrg_f</i>   | ATGAAAATCAATCTGAGTGGACAGATCAC   |
|                | <i>platrg_r</i>   | CAGAAGCGATATTGCAGAC             |
| <i>caf1</i>    | <i>caftrg_f</i>   | TGCATTATTTGGAAGTATTGCAACTGCTA   |
|                | <i>caftrg_r</i>   | CCGCCTTTGGAACCAATTGAGC          |
| <i>fopA</i>    | <i>foatrg_f</i>   | GATGAGATTA AAAAGTATTGTTATAGCTAC |
|                | <i>foatrg_r</i>   | CTGCAGCATATGGAGTAAACATAGTAT     |
| <i>wbk</i>     | <i>wbktrg_f</i>   | GCAACTCCGCGTAAAGTGTCTGATAA      |
|                | <i>wbktrg_r</i>   | GTCAATGTTTAGAGTCTTTGGTTACTCAAG  |
| <i>ISFu2</i>   | <i>isftrg_f</i>   | ATCATTCTTAAAAATCACAAAAAGGTATACA |
|                | <i>isftrg_r</i>   | ATACCTTGAATATGCTGCCTGATTTTCATT  |
| <i>pdpD</i>    | <i>pdptrg_f</i>   | CTGATGACTTAATTGGTTTTTCAGATGCTA  |
|                | <i>pdptrg_r</i>   | GTTTGTGAGTAGTTAATTAAGTATCTTGAAC |
| <i>com1</i>    | <i>comtrg_f</i>   | CCCTGCAATTGGAACGAAG             |
|                | <i>comtrg_r</i>   | GTTCTGATAATTGGCCGTCGACA         |
| <i>ser</i>     | <i>sertrg_f</i>   | CCACTTCGTTGGCCTCCC              |
|                | <i>sertrg_r</i>   | ACACGAAGCTGCCACCT               |
| <i>IS1111</i>  | <i>is1trg_f</i>   | GGGCTGCGTGGTGATG                |
|                | <i>is1trg_r</i>   | GCGCCATGAATCAATAACGTCCTTA       |
| <i>icd</i>     | <i>icdtrg_f</i>   | CGGAGTTAACCGGAGTATCCA           |
|                | <i>icdtrg_r</i>   | CCGTGAATTTTCATGATGTTACCTTT      |
| <i>Cry1</i>    | <i>crytrg_f</i>   | CACCATTATCACAAAGATATCGGGTAAGA   |
|                | <i>crytrg_r</i>   | TCAGTTCGTCTGTATTGTTCTCGATC      |
