# Supplementary material for: Development and Comparison of Two Assay Formats for Parallel Detection of Four Biothreat Pathogens by Using Suspension Microarrays
Source: PLoS One. 2012 Feb 15;7(2):e31958. doi: 10.1371/journal.pone.0031958 (PMC3280232; doi:10.1371/journal.pone.0031958)
Supplement: Table S2 — Panel of organisms that was used for validation of the DH and TSPE-UH microarrays. Values displayed are MFI values. Highlighted are values that exceed the threshold as described in the text. The com probe is not included as its use for specific detection was invalidated. (PDF) [file pone.0031958.s002.pdf]

Table S2. Specificity panel DH microarray

highlight = value above threshold

| Species                                                    | strain ID                                            | origin                                               | <i>B. anthracis</i> probes                  |       |       |       |       | <i>F. tularensis</i> probes |       |      |       |       | <i>Y. pestis</i> probes |       |       |       | <i>C. burnetii</i> probes |       |      |  | IC |
|------------------------------------------------------------|------------------------------------------------------|------------------------------------------------------|---------------------------------------------|-------|-------|-------|-------|-----------------------------|-------|------|-------|-------|-------------------------|-------|-------|-------|---------------------------|-------|------|--|----|
|                                                            |                                                      |                                                      | pl3                                         | cya   | cab   | foa   | ist   | wbk                         | pdf   | pdm  | xpo   | yln   | pla                     | caf   | ser   | isl   | icd                       | ery   |      |  |    |
| <i>Bacillus anthracis</i>                                  | NCTC 109                                             | Shaving brush, London, 1920                          | 14674                                       | 939   | 1873  | 474   | 778   | 417                         | 935   | 630  | 771   | 486   | 505                     | 666   | 532   | 757   | 621                       | 627   | 647  |  |    |
|                                                            | NCTC 8234                                            | Weybridge, 1951 (Sterne)                             | 7660                                        | 9424  | 1033  | 862   | 1211  | 575                         | 1482  | 717  | 1716  | 654   | 656                     | 1085  | 893   | 1281  | 936                       | 1151  |      |  |    |
|                                                            | NCTC 7753                                            | Bradford, 1948                                       | 14441                                       | 2171  | 22746 | 423   | 858   | 398                         | 922   | 458  | 961   | 550   | 452                     | 715   | 573   | 820   | 653                       | 757   |      |  |    |
|                                                            | NCTC 7752                                            | Bradford, 1948                                       | 15574                                       | 1974  | 22066 | 416   | 743   | 358                         | 787   | 372  | 863   | 441   | 353                     | 727   | 502   | 725   | 571                       | 616   |      |  |    |
|                                                            | NCTC 5444                                            | St Marys Hospital, London, 1938                      | 14630                                       | 2128  | 21265 | 456   | 869   | 404                         | 929   | 360  | 1008  | 593   | 405                     | 713   | 544   | 790   | 618                       | 753   |      |  |    |
|                                                            | NCTC 2620                                            | Chinese hide, London, 1928                           | 7483                                        | 11917 | 12926 | 485   | 845   | 379                         | 945   | 416  | 931   | 535   | 428                     | 784   | 581   | 807   | 671                       | 754   |      |  |    |
|                                                            | NCTC 1328                                            | London, 1922                                         | 11803                                       | 16200 | 15371 | 477   | 863   | 413                         | 894   | 469  | 1940  | 558   | 445                     | 778   | 543   | 752   | 670                       | 739   |      |  |    |
|                                                            | NCTC 10340                                           | Cow, Edinburgh, 1963 (Vollum)                        | 4386                                        | 5392  | 5076  | 868   | 1322  | 550                         | 1421  | 781  | 1388  | 731   | 810                     | 1109  | 796   | 1335  | 1036                      | 1316  |      |  |    |
| <i>Francisella tularensis</i> subsp. <i>tularensis</i> (A) | ATCC 6223                                            | Human lymph node, Utah USA, 1920                     | 561                                         | 615   | 524   | 24025 | 10127 | 20643                       | 6155  | 346  | 596   | 420   | 447                     | 546   | 1054  | 643   | 521                       | 625   |      |  |    |
|                                                            | HFSC4                                                | Dugway, Utah, USA                                    | 1298                                        | 1158  | 976   | 28026 | 13874 | 22025                       | 9967  | 853  | 1982  | 1623  | 1936                    | 1446  | 3400  | 1462  | 1301                      | 1493  |      |  |    |
|                                                            | HFSC15 (SR/1)                                        |                                                      | 1192                                        | 1088  | 884   | 28570 | 13726 | 23537                       | 10531 | 601  | 2074  | 1431  | 1863                    | 1233  | 3474  | 1424  | 1398                      | 1206  |      |  |    |
|                                                            | SEV23                                                | Isodes tick, Australia, 1990                         | 996                                         | 904   | 1098  | 28382 | 14169 | 23089                       | 10405 | 808  | 1976  | 1304  | 1695                    | 1129  | 3128  | 1968  | 1325                      | 1051  |      |  |    |
| <i>Francisella tularensis</i> subsp. <i>holarctica</i> (F) | BD07-537                                             | Clinical isolate, Netherlands, 2007                  | 995                                         | 1305  | 1104  | 6786  | 4241  | 6453                        | 1716  | 713  | 1290  | 726   | 921                     | 1214  | 1026  | 1281  | 1011                      | 1035  |      |  |    |
|                                                            | LVS                                                  | Live vaccine strain, Russia                          | 1442                                        | 1623  | 1471  | 28947 | 12802 | 18828                       | 1730  | 1057 | 2326  | 1787  | 1819                    | 1467  | 3102  | 1385  | 1169                      | 1999  |      |  |    |
|                                                            | T8                                                   | Tick, Japan, 1957                                    | 944                                         | 1001  | 1019  | 28223 | 13549 | 11600                       | 1133  | 683  | 1842  | 1098  | 1369                    | 1023  | 1733  | 1192  | 889                       | 1179  |      |  |    |
|                                                            | T21 (FSC089)                                         | Human blood, Norway, 1989                            | 1225                                        | 1468  | 1076  | 28224 | 13911 | 18321                       | 1406  | 1099 | 2177  | 1147  | 1908                    | 1300  | 2782  | 1317  | 1381                      | 1474  |      |  |    |
|                                                            | T20                                                  | Clinical isolate, France, 1994                       | 1038                                        | 1344  | 1084  | 28228 | 13477 | 23259                       | 1520  | 832  | 1480  | 1303  | 1617                    | 1254  | 2584  | 1382  | 2203                      | 1266  |      |  |    |
|                                                            | T4                                                   | Vaccin strain SBL, vaccin                            | 1446                                        | 1135  | 1160  | 28413 | 12881 | 20720                       | 1240  | 876  | 2192  | 1571  | 1737                    | 1629  | 3174  | 1442  | 1684                      | 1818  |      |  |    |
|                                                            | T23                                                  | Clinical isolate, Sweden, 1998                       | 1420                                        | 1090  | 1053  | 28818 | 13658 | 22490                       | 1666  | 1012 | 2370  | 1475  | 2042                    | 1459  | 2908  | 2093  | 1445                      | 1427  |      |  |    |
|                                                            | T11                                                  | Clinical isolate, Sweden, 1984                       | 1379                                        | 1351  | 1280  | 27850 | 13331 | 20409                       | 2888  | 720  | 2293  | 2347  | 1484                    | 1468  | 3271  | 1494  | 1815                      | 1517  |      |  |    |
|                                                            | <i>Francisella tularensis</i> subsp. <i>novicida</i> | ATCC 15482                                           | Water, USA, 1951                            | 1020  | 1153  | 853   | 15785 | 9874                        | 490   | 4713 | 15350 | 1031  | 713                     | 739   | 926   | 855   | 1214                      | 970   | 1000 |  |    |
|                                                            |                                                      | Kenya 164                                            | Biovar antiqua, Kenya, <1952                | 1404  | 1393  | 1230  | 995   | 1900                        | 696   | 1804 | 958   | 6274  | 5853                    | 6778  | 5903  | 986   | 1663                      | 1302  | 1564 |  |    |
| Harbin                                                     |                                                      | Biovar mediaevalis, China, <1948                     | 1718                                        | 1365  | 1460  | 1472  | 3940  | 1256                        | 1833  | 1088 | 24860 | 24038 | 26643                   | 24626 | 1546  | 1520  | 1257                      | 1861  |      |  |    |
| KIM3                                                       |                                                      | Biovar mediaevalis, Kurdistan, 1968                  | 795                                         | 685   | 697   | 1519  | 3044  | 1531                        | 791   | 585  | 24556 | 22975 | 965                     | 24584 | 1474  | 856   | 1123                      | 868   |      |  |    |
| Madagascar 34-94                                           |                                                      | Biovar orientalis, Madagascar                        | 1619                                        | 1466  | 1398  | 1309  | 3834  | 1306                        | 1700  | 1050 | 25211 | 23762 | 27301                   | 25401 | 1497  | 1587  | 1370                      | 1716  |      |  |    |
| Madagascar 73-93                                           |                                                      | Biovar orientalis, Madagascar                        | 1048                                        | 890   | 1041  | 1933  | 3133  | 1329                        | 950   | 819  | 23772 | 22413 | 26055                   | 24505 | 1247  | 1017  | 1253                      | 1129  |      |  |    |
| Nha Trang 63-115                                           |                                                      | Biovar orientalis, Vietnam                           | 665                                         | 675   | 608   | 450   | 824   | 435                         | 897   | 444  | 19204 | 15652 | 23654                   | 743   | 546   | 784   | 580                       | 677   |      |  |    |
| Hamburg 19                                                 |                                                      | Biovar orientalis, Hamburg                           | 790                                         | 721   | 670   | 445   | 1671  | 427                         | 862   | 363  | 19612 | 15687 | 400                     | 18617 | 524   | 788   | 677                       | 763   |      |  |    |
| EV 76                                                      |                                                      | Biovar orientalis, Madagascar                        | 773                                         | 705   | 707   | 489   | 1248  | 406                         | 901   | 456  | 18632 | 14806 | 23578                   | 16504 | 551   | 774   | 652                       | 783   |      |  |    |
| Peru 184                                                   |                                                      | Peru                                                 | 718                                         | 666   | 630   | 424   | 1511  | 394                         | 781   | 426  | 19188 | 16549 | 22941                   | 18319 | 523   | 770   | 567                       | 678   |      |  |    |
| NCTC 5923                                                  |                                                      | Java, 1939                                           | 912                                         | 983   | 850   | 1495  | 3084  | 1447                        | 939   | 777  | 24780 | 23186 | 26704                   | 24991 | 1593  | 1174  | 1478                      | 1063  |      |  |    |
| NCTC 10029                                                 |                                                      | Human bubonic plague, Nairobi, 1958                  | 1799                                        | 1552  | 1575  | 1592  | 4118  | 1378                        | 1939  | 1201 | 1638  | 23731 | 27314                   | 25252 | 1722  | 1581  | 1784                      | 1465  |      |  |    |
| NCTC 10030                                                 |                                                      | Human fatal bubonic plague, Nairobi, 1958            | 1738                                        | 1506  | 1551  | 1674  | 1817  | 1371                        | 2008  | 1187 | 1702  | 23689 | 27109                   | 25132 | 1798  | 1769  | 1723                      | 1456  |      |  |    |
| NCTC 10330                                                 |                                                      | Nairobi, 1963                                        | 1815                                        | 1486  | 1565  | 1695  | 4191  | 1438                        | 1976  | 1231 | 1732  | 23770 | 27274                   | 24958 | 1735  | 1695  | 1806                      | 1393  |      |  |    |
| <i>Yersinia pestis</i>                                     |                                                      | Nine Mile                                            | Dermacentor andersoni (tick), Montana, 1937 | 1029  | 1001  | 802   | 840   | 1100                        | 826   | 931  | 595   | 1027  | 878                     | 725   | 909   | 5792  | 7851                      | 9362  | 915  |  |    |
|                                                            | Priscilla                                            | Goat cotyledon, USA, 1980                            | 482                                         | 732   | 377   | 1442  | 465   | 634                         | 470   | 290  | 474   | 429   | 483                     | 436   | 23060 | 24254 | 23821                     | 653   |      |  |    |
|                                                            | 48                                                   | <i>Haemaphysalis punctata</i> (tick), Slovakia, 1967 | 581                                         | 587   | 393   | 1170  | 464   | 669                         | 460   | 290  | 621   | 470   | 522                     | 428   | 22171 | 23022 | 24256                     | 511   |      |  |    |
|                                                            | S                                                    | Hepatitis, chronic Q-fever, USA, 1981                | 642                                         | 535   | 412   | 676   | 514   | 685                         | 492   | 319  | 626   | 509   | 531                     | 462   | 20538 | 23280 | 24204                     | 557   |      |  |    |
|                                                            | ChuG_Q212                                            | Human hart valve, Nova Scotia, 1981                  | 669                                         | 548   | 424   | 901   | 545   | 787                         | 552   | 336  | 662   | 570   | 643                     | 487   | 20491 | 22439 | 19719                     | 601   |      |  |    |
|                                                            | Henzerling                                           | Human vaccine strain, Italy, 1945                    | 751                                         | 693   | 493   | 1416  | 598   | 884                         | 582   | 379  | 736   | 566   | 665                     | 508   | 20670 | 22526 | 21158                     | 628   |      |  |    |
|                                                            | <i>Bacillus atrophaeus</i>                           | ATCC 9372                                            |                                             | 857   | 782   | 826   | 551   | 834                         | 488   | 1052 | 572   | 864   | 541                     | 534   | 766   | 549   | 797                       | 704   | 821  |  |    |
|                                                            |                                                      | ATCC 11778                                           | NCIB Aberdeen, 1962                         | 1005  | 1033  | 771   | 979   | 1139                        | 608   | 1422 | 742   | 1188  | 759                     | 662   | 1119  | 697   | 1087                      | 1025  | 1063 |  |    |
|                                                            | <i>Bacillus cereus</i>                               | BD03-229                                             | Clinical isolate, Netherlands, 2003         | 783   | 760   | 685   | 461   | 859                         | 396   | 993  | 430   | 768   | 532                     | 423   | 767   | 570   | 839                       | 624   | 738  |  |    |
|                                                            |                                                      | BD05-273                                             | Clinical isolate, Netherlands, 2005         | 799   | 767   | 741   | 449   | 827                         | 355   | 917  | 430   | 742   | 532                     | 430   | 686   | 546   | 811                       | 636   | 734  |  |    |
| WSBC 10530                                                 |                                                      | Vomit from cooked rice, USA or UK, 1972              | 780                                         | 723   | 593   | 476   | 848   | 368                         | 945   | 435  | 771   | 560   | 431                     | 774   | 555   | 812   | 695                       | 14776 |      |  |    |
| WSBC 10536                                                 |                                                      | Indian rice dish, Germany/Pasau, 2001                | 710                                         | 744   | 611   | 418   | 760   | 327                         | 853   | 370  | 682   | 481   | 389                     | 685   | 502   | 746   | 562                       | 14712 |      |  |    |
| WSBC 10583                                                 |                                                      | Cooked rice, 1998                                    | 748                                         | 764   | 664   | 435   | 848   | 357                         | 939   | 396  | 738   | 503   | 414                     | 714   | 556   | 798   | 630                       | 16461 |      |  |    |
| ATCC 10876                                                 |                                                      | Contaminated bottle                                  | 742                                         | 736   | 546   | 420   | 747   | 333                         | 891   | 360  | 705   | 473   | 371                     | 660   | 521   | 775   | 566                       | 652   |      |  |    |
| ATCC 7064                                                  |                                                      | Blood                                                | 794                                         | 734   | 659   | 453   | 794   | 357                         | 978   | 426  | 711   | 497   | 404                     | 753   | 517   | 861   | 670                       | 5134  |      |  |    |
| ATCC 14579                                                 |                                                      |                                                      | 744                                         | 726   | 609   | 450   | 857   | 346                         | 897   | 410  | 708   | 534   | 434                     | 720   | 564   | 761   | 616                       | 775   |      |  |    |
| <i>Bacillus coagulans</i>                                  | ATCC 9945                                            | Purchased at Raven Labs, USA                         | 856                                         | 693   | 712   | 545   | 921   | 460                         | 872   | 470  | 753   | 576   | 459                     | 811   | 593   | 851   | 676                       | 14737 |      |  |    |
| <i>Bacillus licheniformis</i>                              | ATCC 9945                                            | Flour, USA                                           | 1440                                        | 1468  | 1255  | 781   | 1711  | 508                         | 1990  | 758  | 1474  | 853   | 669                     | 1271  | 1116  | 1601  | 1187                      | 1301  |      |  |    |
| <i>Bacillus megaterium</i>                                 | ATCC 8245                                            |                                                      | 790                                         | 856   | 684   | 445   | 900   | 461                         | 968   | 474  | 782   | 547   | 441                     | 798   | 632   | 835   | 660                       | 14734 |      |  |    |
| <i>Bacillus pasteurii</i>                                  | ATCC 14581                                           | Edinburgh, 1963                                      | 1440                                        | 1379  | 1335  | 730   | 1605  | 474                         | 1761  | 625  | 1374  | 662   | 689                     | 1305  | 818   | 1500  | 1075                      | 1277  |      |  |    |
| <i>Bacillus mycoides</i>                                   | ATCC 6482                                            |                                                      | 768                                         | 773   | 656   | 500   | 879   | 388                         | 1031  | 450  | 813   | 551   | 473                     | 810   | 587   | 864   | 682                       | 13419 |      |  |    |
| <i>Bacillus pumilus</i>                                    | ATCC 27142                                           |                                                      | 787                                         | 711   | 679   | 456   | 762   | 458                         | 998   | 377  | 781   | 446   | 494                     | 741   | 521   | 864   | 656                       | 671   |      |  |    |
| <i>Bacillus subtilis</i>                                   | ATCC 6633                                            |                                                      | 947                                         | 868   | 645   | 531   | 967   | 411                         | 1191  | 418  | 891   | 457   | 405                     | 805   | 601   | 602   | 905                       | 715   |      |  |    |
| <i>Bacillus thuringiensis</i>                              | ATCC 29730                                           | var. <i>galleriae</i> Heimpel                        | 1401                                        | 1293  | 930   | 779   | 1351  | 629                         | 1740  | 711  | 1308  | 799   | 806                     | 1272  | 852   | 1343  | 1049                      | 2636  |      |  |    |
|                                                            | ATCC 10792                                           | var. <i>berliner</i> , Mediterranean flour moth      | 606                                         | 578   | 528   | 436   | 634   | 417                         | 804   | 430  | 586   | 418   | 365                     | 626   | 440   | 606   | 533                       | 14496 |      |  |    |
|                                                            | BD07-271                                             | var. <i>kurstaki</i>                                 | 606                                         | 578   | 528   | 436   | 634   | 417                         | 804   | 430  | 586   | 418   | 365                     | 626   | 440   | 606   | 533                       | 14496 |      |  |    |
|                                                            | BD07-272                                             | var. <i>azirawai</i>                                 | 606                                         | 578   | 528   | 436   | 634   | 417                         | 804   | 430  | 586   | 418   | 365                     | 626   | 440   | 606   | 533                       | 14496 |      |  |    |
|                                                            | BD07-273                                             | var. <i>galleriae</i>                                | 606                                         | 578   | 528   | 436   | 634   | 417                         | 804   | 430  | 586   | 418   | 365                     | 626   | 440   | 606   | 533                       | 14496 |      |  |    |
|                                                            | NCTC 10229                                           | Bird, Budapest                                       | 959                                         | 840   | 870   | 545   | 1039  | 431                         | 1180  |      |       |       |                         |       |       |       |                           |       |      |  |    |

Table S2. Specificity panel TSPE-UH microarray

highlight = value above threshold

|                                                             |                  |                                                      | <i>B. anthracis</i> probes |      |      | <i>F. tularensis</i> probes |      |      |       |       | <i>Y. pestis</i> probes |      |       |       | <i>C. burnetii</i> probes |      |      |      | IC |
|-------------------------------------------------------------|------------------|------------------------------------------------------|----------------------------|------|------|-----------------------------|------|------|-------|-------|-------------------------|------|-------|-------|---------------------------|------|------|------|----|
| Species                                                     | strain ID        | origin                                               | p13                        | cya  | cab  | foa                         | isf  | wbk  | pdf   | pdm   | ypo                     | yn   | pla   | caf   | ser                       | isl  | icd  | cry  |    |
| <i>Bacillus anthracis</i>                                   | NCTC 109         | Shaving brush, London, 1920                          | 10990                      | 309  | 296  | 250                         | 253  | 261  | 295   | 288   | 295                     | 378  | 293   | 265   | 350                       | 283  | 266  | 365  |    |
|                                                             | NCTC 8234        | Weybridge, 1951 (Sterne)                             | 9625                       | 2712 | 296  | 302                         | 386  | 383  | 400   | 385   | 238                     | 373  | 276   | 339   | 423                       | 326  | 266  | 388  |    |
|                                                             | NCTC 7753        | Bradford, 1948                                       | 11242                      | 303  | 4683 | 302                         | 236  | 249  | 237   | 265   | 299                     | 286  | 217   | 305   | 259                       | 224  | 202  | 280  |    |
|                                                             | NCTC 7752        | Bradford, 1948                                       | 12154                      | 252  | 5919 | 299                         | 287  | 311  | 267   | 316   | 267                     | 348  | 244   | 245   | 246                       | 238  | 258  | 287  |    |
|                                                             | NCTC 5444        | St Marys Hospital, London, 1938                      | 11948                      | 342  | 5720 | 287                         | 289  | 343  | 274   | 313   | 237                     | 320  | 278   | 304   | 239                       | 277  | 267  | 251  |    |
|                                                             | NCTC 2620        | Chinese hide, London, 1928                           | 12208                      | 3729 | 5538 | 271                         | 281  | 298  | 223   | 297   | 244                     | 271  | 328   | 295   | 259                       | 266  | 282  | 379  |    |
|                                                             | NCTC 1328        | London, 1922                                         | 13537                      | 3625 | 9113 | 284                         | 252  | 348  | 280   | 302   | 240                     | 347  | 291   | 290   | 296                       | 241  | 225  | 228  |    |
|                                                             | NCTC 10340       | Cow, Edinburgh, 1963 (Vollum)                        | 11048                      | 3880 | 4177 | 327                         | 291  | 406  | 204   | 395   | 224                     | 296  | 322   | 357   | 287                       | 288  | 304  | 435  |    |
| <i>Francisella tularensis</i> subsp. <i>tularensis</i> (A)  | ATCC 6223        | Human lymph node, Utah USA, 1920                     | 208                        | 321  | 305  | 9879                        | 3919 | 7655 | 11145 | 373   | 291                     | 315  | 319   | 270   | 280                       | 306  | 252  | 186  |    |
|                                                             | HFSC4            | Dugway, Utah, USA                                    | 244                        | 299  | 285  | 10763                       | 5297 | 7005 | 10946 | 311   | 268                     | 332  | 251   | 354   | 274                       | 272  | 240  | 308  |    |
|                                                             | HFSC15 (SR/1)    |                                                      | 254                        | 242  | 268  | 10103                       | 3369 | 5993 | 11047 | 220   | 263                     | 307  | 254   | 337   | 249                       | 295  | 247  | 220  |    |
| <i>Francisella tularensis</i> subsp. <i>holartctica</i> (B) | SEV23            | Ixodes tick, Australia, 1990                         | 240                        | 234  | 240  | 10376                       | 4239 | 4590 | 10469 | 246   | 251                     | 344  | 275   | 285   | 208                       | 257  | 201  | 284  |    |
|                                                             | BD07-537         | Clinical isolate, Netherlands, 2007                  | 223                        | 290  | 195  | 10277                       | 4130 | 5472 | 216   | 243   | 166                     | 279  | 205   | 227   | 266                       | 231  | 183  | 272  |    |
|                                                             | LVS              | Live vaccine strain, Russia                          | 361                        | 350  | 257  | 8755                        | 4283 | 6902 | 352   | 330   | 304                     | 348  | 283   | 273   | 302                       | 250  | 292  | 269  |    |
|                                                             | T8               | Tick, Japan, 1957                                    | 243                        | 171  | 252  | 9824                        | 4484 | 4131 | 301   | 231   | 201                     | 279  | 157   | 288   | 260                       | 275  | 288  | 311  |    |
|                                                             | T21 (FSC089)     | Human blood, Norway, 1989                            | 275                        | 223  | 232  | 10039                       | 4754 | 5920 | 273   | 302   | 267                     | 260  | 273   | 307   | 178                       | 287  | 252  | 324  |    |
|                                                             | T20              | Clinical isolate, France, 1994                       | 281                        | 179  | 248  | 11607                       | 2949 | 7061 | 292   | 227   | 271                     | 340  | 277   | 290   | 249                       | 269  | 259  | 233  |    |
|                                                             | T4               | Vaccin strain SBL vaccin                             | 307                        | 261  | 243  | 8870                        | 4391 | 5405 | 265   | 305   | 241                     | 313  | 261   | 309   | 261                       | 265  | 200  | 246  |    |
|                                                             | T23              | Clinical isolate, Sweden, 1998                       | 256                        | 253  | 274  | 9459                        | 4340 | 5923 | 198   | 335   | 218                     | 314  | 249   | 269   | 251                       | 237  | 251  | 340  |    |
| <i>Francisella tularensis</i> subsp. <i>novicida</i>        | ATCC 15482       | Water, USA, 1951                                     | 322                        | 355  | 256  | 11193                       | 3502 | 361  | 8550  | 10385 | 261                     | 337  | 359   | 306   | 280                       | 272  | 269  | 223  |    |
| <i>Yersinia pestis</i>                                      | Kenya 164        | Biovar antiqua, Kenya, <1952                         | 741                        | 196  | 215  | 230                         | 300  | 318  | 305   | 148   | 10956                   | 6114 | 6542  | 10921 | 294                       | 258  | 312  | 293  |    |
|                                                             | Harbin           | Biovar mediaevalis, China, <1948                     | 208                        | 360  | 307  | 251                         | 310  | 287  | 251   | 257   | 13474                   | 6691 | 10670 | 12511 | 253                       | 295  | 315  | 261  |    |
|                                                             | KIM3             | Biovar mediaevalis, Kurdistan, 1968                  | 201                        | 213  | 219  | 216                         | 218  | 270  | 212   | 244   | 15671                   | 4254 | 203   | 12437 | 192                       | 220  | 186  | 209  |    |
|                                                             | Madagascar 34-94 | Biovar orientalis, Madagascar                        | 296                        | 275  | 250  | 253                         | 284  | 358  | 250   | 258   | 12674                   | 6726 | 7636  | 11322 | 421                       | 275  | 200  | 328  |    |
|                                                             | Madagascar 73-93 | Biovar orientalis, Madagascar                        | 1719                       | 248  | 264  | 198                         | 305  | 271  | 206   | 241   | 7942                    | 4731 | 5674  | 10459 | 215                       | 208  | 194  | 191  |    |
|                                                             | Nha Trang 63-115 | Biovar orientalis, Vietnam                           | 227                        | 265  | 247  | 243                         | 307  | 306  | 196   | 270   | 13390                   | 6103 | 9320  | 228   | 280                       | 183  | 262  | 287  |    |
|                                                             | Hamburg 19       | Biovar orientalis, Hamburg                           | 213                        | 254  | 190  | 259                         | 304  | 252  | 264   | 233   | 13478                   | 6490 | 268   | 12609 | 217                       | 249  | 269  | 335  |    |
|                                                             | EV 76            | Biovar orientalis, Madagascar                        | 325                        | 267  | 258  | 258                         | 235  | 328  | 232   | 179   | 13862                   | 6392 | 7196  | 12942 | 236                       | 284  | 286  | 269  |    |
|                                                             | Peru 184         | Peru                                                 | 235                        | 278  | 344  | 270                         | 225  | 293  | 243   | 229   | 13900                   | 7196 | 10442 | 12821 | 308                       | 224  | 324  | 391  |    |
|                                                             | NCTC 5923        | Java, 1939                                           | 212                        | 282  | 256  | 193                         | 225  | 262  | 227   | 247   | 14965                   | 4669 | 9889  | 13467 | 268                       | 219  | 189  | 260  |    |
|                                                             | NCTC 10029       | Human bubonic plague, Nairobi, 1958                  | 296                        | 308  | 314  | 283                         | 201  | 321  | 329   | 232   | 292                     | 5361 | 7989  | 12550 | 307                       | 297  | 255  | 263  |    |
|                                                             | NCTC 10030       | Human fatal bubonic plague, Nairobi, 1958            | 1506                       | 281  | 274  | 292                         | 283  | 329  | 241   | 290   | 330                     | 4708 | 6834  | 11857 | 275                       | 246  | 249  | 355  |    |
| <i>Yersinia pestis</i>                                      | NCTC 10330       | Nairobi, 1963                                        | 237                        | 311  | 267  | 211                         | 329  | 342  | 265   | 284   | 262                     | 5188 | 7450  | 12006 | 263                       | 261  | 260  | 322  |    |
| <i>Coxiella burnetii</i>                                    | Nine Mile        | <i>Dermacentor andersoni</i> (tick), Montana, 1937   | 272                        | 296  | 231  | 287                         | 233  | 327  | 269   | 265   | 284                     | 323  | 222   | 200   | 3587                      | 2768 | 4562 | 276  |    |
|                                                             | Priscilla        | Goat cotyledon, USA, 1980                            | 382                        | 506  | 513  | 441                         | 411  | 541  | 454   | 430   | 456                     | 598  | 496   | 381   | 7924                      | 7308 | 6741 | 970  |    |
|                                                             | 48               | <i>Haemaphysalis punctata</i> (tick), Slovakia, 1967 | 369                        | 342  | 443  | 517                         | 464  | 489  | 449   | 442   | 374                     | 433  | 482   | 470   | 9380                      | 8610 | 8765 | 426  |    |
|                                                             | S                | Hepatitis, chronic Q-fever, USA, 1981                | 424                        | 411  | 469  | 409                         | 376  | 402  | 273   | 473   | 389                     | 433  | 382   | 400   | 9317                      | 8196 | 9716 | 437  |    |
|                                                             | ChuG-Q212        | Human hart valve, Nova Scotia, 1981                  | 305                        | 430  | 449  | 364                         | 344  | 428  | 335   | 302   | 316                     | 356  | 343   | 392   | 10119                     | 8027 | 9439 | 341  |    |
|                                                             | Henzerling       | Human vaccine strain, Italy, 1945                    | 357                        | 323  | 319  | 345                         | 364  | 355  | 410   | 312   | 348                     | 430  | 372   | 403   | 9611                      | 8547 | 9718 | 304  |    |
| <i>Bacillus atrophaeus</i>                                  | ATCC 9372        |                                                      | 252                        | 229  | 285  | 323                         | 266  | 309  | 330   | 320   | 251                     | 384  | 284   | 281   | 328                       | 370  | 245  | 333  |    |
| <i>Bacillus cereus</i>                                      | ATCC 11778       | NCIB Aberdeen, 1962                                  | 207                        | 326  | 264  | 271                         | 344  | 358  | 255   | 283   | 316                     | 393  | 258   | 211   | 293                       | 220  | 297  | 344  |    |
|                                                             | BD03-229         | Clinical isolate, Netherlands, 2003                  | 319                        | 301  | 314  | 339                         | 270  | 294  | 301   | 269   | 261                     | 392  | 334   | 271   | 316                       | 293  | 287  | 355  |    |
|                                                             | BD05-273         | Clinical isolate, Netherlands, 2005                  | 273                        | 326  | 192  | 263                         | 279  | 227  | 290   | 259   | 238                     | 270  | 242   | 260   | 286                       | 258  | 271  | 215  |    |
|                                                             | WSBC 10530       | Vomit from cooked rice, USA or UK, 1972              | 264                        | 307  | 214  | 233                         | 217  | 295  | 275   | 227   | 247                     | 306  | 312   | 190   | 239                       | 272  | 215  | 4218 |    |
|                                                             | WSBC 10536       | Indian rice dish, Germany/Pasau, 2001                | 237                        | 289  | 278  | 263                         | 301  | 313  | 291   | 317   | 231                     | 440  | 209   | 297   | 391                       | 293  | 226  | 5854 |    |
|                                                             | WSBC 10583       | Cooked rice, 1998                                    | 204                        | 260  | 302  | 266                         | 268  | 290  | 204   | 221   | 238                     | 274  | 261   | 249   | 220                       | 297  | 209  | 4983 |    |
|                                                             | ATCC 10876       | Contaminated bottle                                  | 224                        | 250  | 219  | 207                         | 250  | 264  | 177   | 218   | 219                     | 356  | 299   | 224   | 249                       | 244  | 274  | 260  |    |
|                                                             | ATCC 7064        | Blood                                                | 263                        | 240  | 322  | 312                         | 265  | 298  | 236   | 218   | 190                     | 285  | 207   | 222   | 242                       | 216  | 249  | 5313 |    |
| <i>Bacillus coagulans</i>                                   | ATCC 14579       |                                                      | 292                        | 367  | 336  | 269                         | 280  | 463  | 369   | 294   | 269                     | 405  | 244   | 265   | 327                       | 255  | 321  | 333  |    |
| <i>Bacillus coagulans</i>                                   |                  | Purchased at Raven Labs, USA                         | 345                        | 286  | 263  | 1035                        | 300  | 314  | 301   | 237   | 267                     | 293  | 226   | 331   | 383                       | 262  | 270  | 5161 |    |
| <i>Bacillus licheniformis</i>                               | ATCC 9945        | Flour, USA                                           | 222                        | 216  | 273  | 243                         | 252  | 356  | 261   | 360   | 270                     | 299  | 259   | 267   | 360                       | 318  | 249  | 310  |    |
| <i>Bacillus megaterium</i>                                  | ATCC 8245        |                                                      | 321                        | 281  | 292  | 306                         | 284  | 430  | 284   | 256   | 226                     | 442  | 292   | 308   | 390                       | 290  | 230  | 5779 |    |
| <i>Bacillus megaterium</i>                                  | ATCC 14581       | Edinburgh, 1963                                      | 259                        | 253  | 244  | 226                         | 241  | 327  | 230   | 256   | 250                     | 309  | 218   | 244   | 297                       | 232  | 257  | 215  |    |
| <i>Bacillus mycoides</i>                                    | ATCC 6462        |                                                      | 282                        | 318  | 237  | 267                         | 232  | 310  | 212   | 270   | 248                     | 283  | 213   | 306   | 279                       | 287  | 318  | 2659 |    |
| <i>Bacillus pumilus</i>                                     | ATCC 27142       |                                                      | 292                        | 193  | 200  | 231                         | 276  | 311  | 254   | 220   | 257                     | 312  | 248   | 297   | 291                       | 181  | 280  | 217  |    |
| <i>Bacillus subtilis</i>                                    | ATCC 6633        |                                                      | 822                        | 407  | 276  | 243                         | 315  | 431  | 233   | 294   | 285                     | 330  | 306   | 303   | 408                       | 348  | 326  | 287  |    |
| <i>Bacillus thuringiensis</i>                               | ATCC 29730       | var. <i>galleriae</i> Heimpel                        | 271                        | 287  | 207  | 267                         | 235  | 402  | 191   | 257   | 235                     | 347  | 312   | 274   | 291                       | 202  | 270  | 2315 |    |
|                                                             | ATCC 10792       | var. <i>berliner</i> , Mediterranean flour moth      | 251                        | 310  | 200  | 282                         | 220  | 302  | 263   | 330   | 221                     | 313  | 222   | 274   | 359                       | 255  | 246  | 4287 |    |
|                                                             | BD07-271         | var. <i>kurstaki</i>                                 | 251                        | 310  | 200  | 282                         | 220  | 302  | 263   | 330   | 221                     | 313  | 222   | 274   | 359                       | 255  | 246  | 4287 |    |
|                                                             | BD07-272         | var. <i>aizawai</i>                                  | 251                        | 310  | 200  | 282                         | 220  | 302  | 263   | 330   | 221                     | 313  | 222   | 274   | 359                       | 255  | 246  | 4287 |    |
|                                                             | BD07-273         | var. <i>galleriae</i>                                | 251                        | 310  | 200  | 282                         | 220  | 302  | 263   | 330   | 221                     | 313  | 222   | 274   | 359                       | 255  | 246  | 4287 |    |
| <i>Burkholderia mallei</i>                                  | NCTC 10229       | Bird, Budapest                                       | 220                        | 251  | 239  | 225                         | 205  | 253  | 221   | 2     |                         |      |       |       |                           |      |      |      |    |
